# Supplementary material for: Application of Micro-Tubing Reeling System to Serial Femtosecond Crystallography
Source: Preprints.org preprint supplement (doi:10.20944/preprints202312.1545.v1), 2023-12-20
Supplement: Supplementary file 1 [file supplementary]

## Supplementary Materials

# Application of micro-tubing reeling system to serial femtosecond crystallography

Jihan Kim <sup>1,#</sup>, Sehan Park <sup>2,#</sup>, Yunje Cho <sup>1,\*</sup> and Jaehyun Park <sup>2,\*</sup>

<sup>1</sup>Department of Life Sciences, Pohang University of Science and Technology, Pohang 37673, Republic of Korea

<sup>2</sup>Pohang Accelerator Laboratory, Pohang University of Science and Technology, Pohang 37673, Republic of Korea

\*Correspondence: [yunje@postech.ac.kr](mailto:yunje@postech.ac.kr), [jaehyun.park@postech.ac.kr](mailto:jaehyun.park@postech.ac.kr)

#Equally contributed to this work

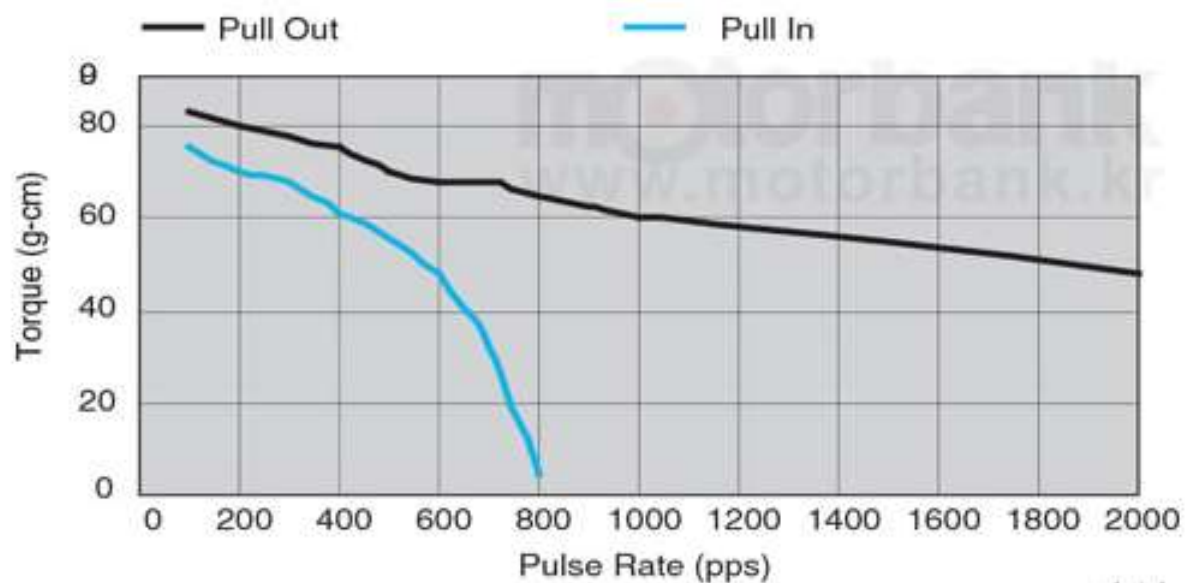

**Supplementary Fig. 1 Relation between pps and torque of the mini-rotor.** The torque value was estimated from the curve of “Pull In”.

**Supplementary Mov. 1 Real-time view of the MRS operation during the SFX experiment.** The MCC is moving from right to left direction during the operation. This monitoring movie was taken with a long working distance microscope (WD=300mm) installed at the MICOSS.
